# Supplementary material for: High mitochondrial DNA levels accelerate lung adenocarcinoma progression
Source: PubMed Central journal article supplement (PMC11529711; doi:10.1126/sciadv.adp3481), 2024-11-01
Supplement: sciadv.adp3481_sm.pdf [file sciadv.adp3481_sm.pdf]

Supplementary Materials for  
**High mitochondrial DNA levels accelerate lung adenocarcinoma progression**

Mara Mennuni *et al.*

Corresponding author: Nils-Göran Larsson, nils-goran.larsson@ki.se

*Sci. Adv.* **10**, eadp3481 (2024)  
DOI: 10.1126/sciadv.adp3481

**The PDF file includes:**

Figs. S1 and S2  
Legends for movies S1 to S20

**Other Supplementary Material for this manuscript includes the following:**

Movies S1 to S20

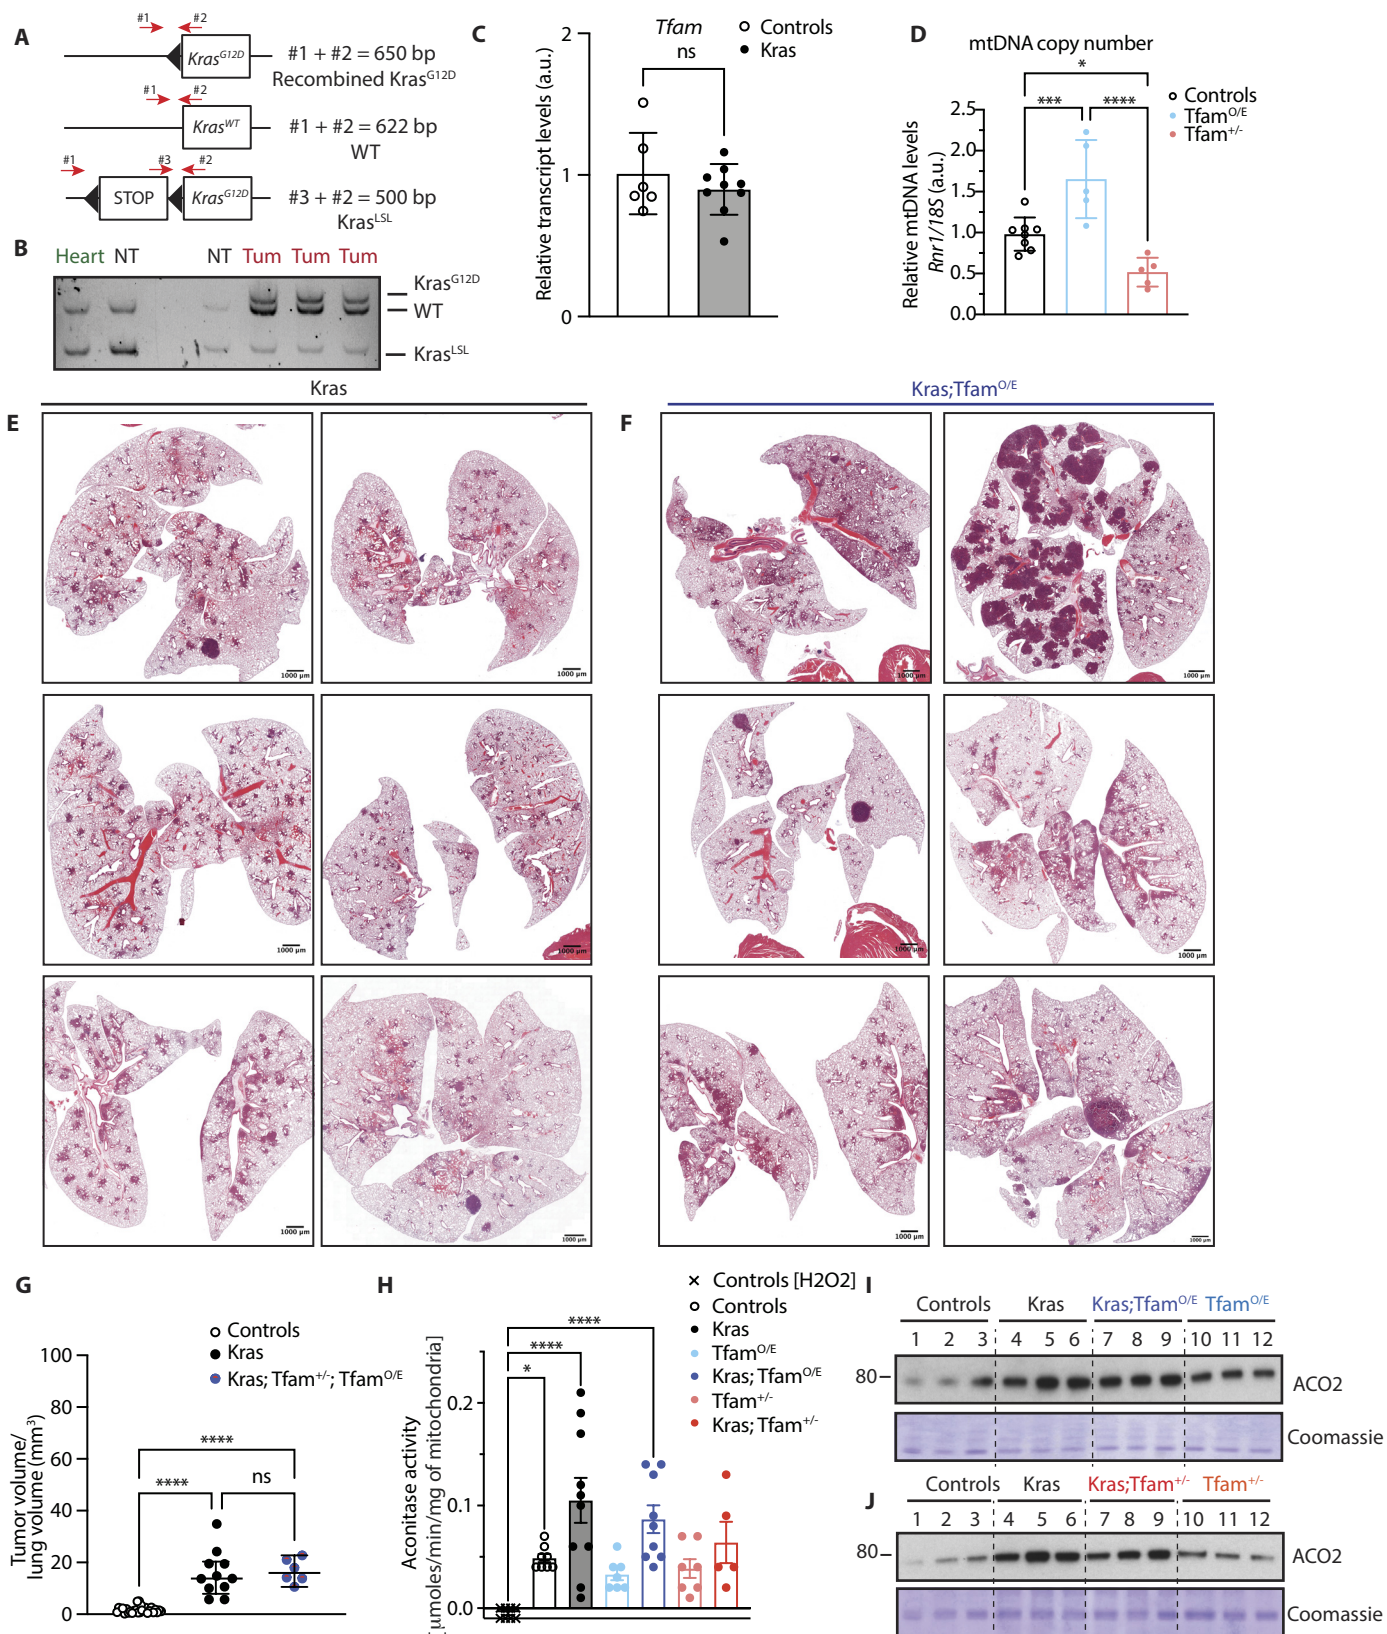

**Figure S1. TFAM overexpression increases mtDNA copy number and enhances tumor burden in the lung without affecting superoxide-induced damage.**

**A.** Schematic representation of the expected PCR product sizes of different *Kras* alleles when using three primers in competition (23). **B.** Agarose gel separation of different *Kras* genetics variants in DNA extracted from laser captured tissue portions of *Kras* mice. Heart, normal lung tissue (NT) and tumor lesions (TUM). **C.** Relative *Tfam* transcript levels measured in whole lung homogenates collected from controls (wild-type) and *Kras* animals. Scatter plot columns report individual and the mean values  $\pm$ SD. Data were normalized against Actin B expression and represent the ratio of controls. Two-tailed t-test was used for statistical analysis; controls:  $N = 6$ ; *Kras*:  $N = 9$ ; ns = not significant ( $P > 0.999$ ). **D.** Relative mtDNA levels normalized to nuclear DNA (*Rnr1/18S*) measured in lung tissue from the wild-type (controls), *Tfam*<sup>O/E</sup> and *Tfam*<sup>-/-</sup> animals. Scatter plots show individual data points and the mean values  $\pm$  SD. One-way ANOVA was used for the statistical analysis; controls:  $N = 8$ , *Tfam*<sup>O/E</sup>:  $N = 5$ , and *Tfam*<sup>-/-</sup>:  $N = 5$ . \* $P = 0.0383$ ; \*\*\* $P = 0.0033$  \*\*\*\* $P < 0.0001$ . **E-F.** Representative images of H&E-stained lung tissue sections from *Kras* (E) and *Kras; Tfam*<sup>O/E</sup> (F) mice. Scale bars: 1mm. **G.** Quantification of lung tumor volume and airways in controls, *Kras* and *Kras; Tfam*<sup>-/-</sup>; *Tfam*<sup>O/E</sup> mice expressed as percentage of tumor over total lung tissue volume. Scatter plots show individual data points and the median for each group. Statistical significance is calculated with one-way ANOVA test. \*\*\*\* $P < 0.0001$ . Controls:  $N = 27$ ; *Kras*:  $N = 11$ ; *Kras* and *Tfam*<sup>-/-</sup>; *Tfam*<sup>O/E</sup>:  $N = 6$ . **H.** Aconitase enzymatic activity measured in mitochondria isolated from lungs as readout of superoxide induced damage. Scatter plot columns report individual data points and mean values  $\pm$ SD. Statistical analysis was performed with standard one-way ANOVA test. All significant differences are reported on the graph. \* $P = 0.0306$ ; \*\*\*\* $P < 0.0001$ . Controls:  $N = 8$ ; *Kras*:  $N = 10$ ; *Tfam*<sup>O/E</sup>:  $N = 8$ ; *Kras; Tfam*<sup>O/E</sup>:  $N = 9$ ; *Tfam*<sup>-/-</sup>:  $N = 7$ ; *Kras; Tfam*<sup>-/-</sup>:  $N = 5$ . Mitochondria from wild-type animals treated with H<sub>2</sub>O<sub>2</sub> are used as negative control for the experiment. **I-J.** Representative western blots showing steady state levels of Aconitase 2 (ACO2) in mitochondria isolated from lung of controls (wild-type), *Kras*, *Tfam*<sup>O/E</sup>, *Kras; Tfam*<sup>O/E</sup> (G), *Tfam*<sup>-/-</sup> and *Kras; Tfam*<sup>-/-</sup> (H). Coomassie staining is showed as loading reference.

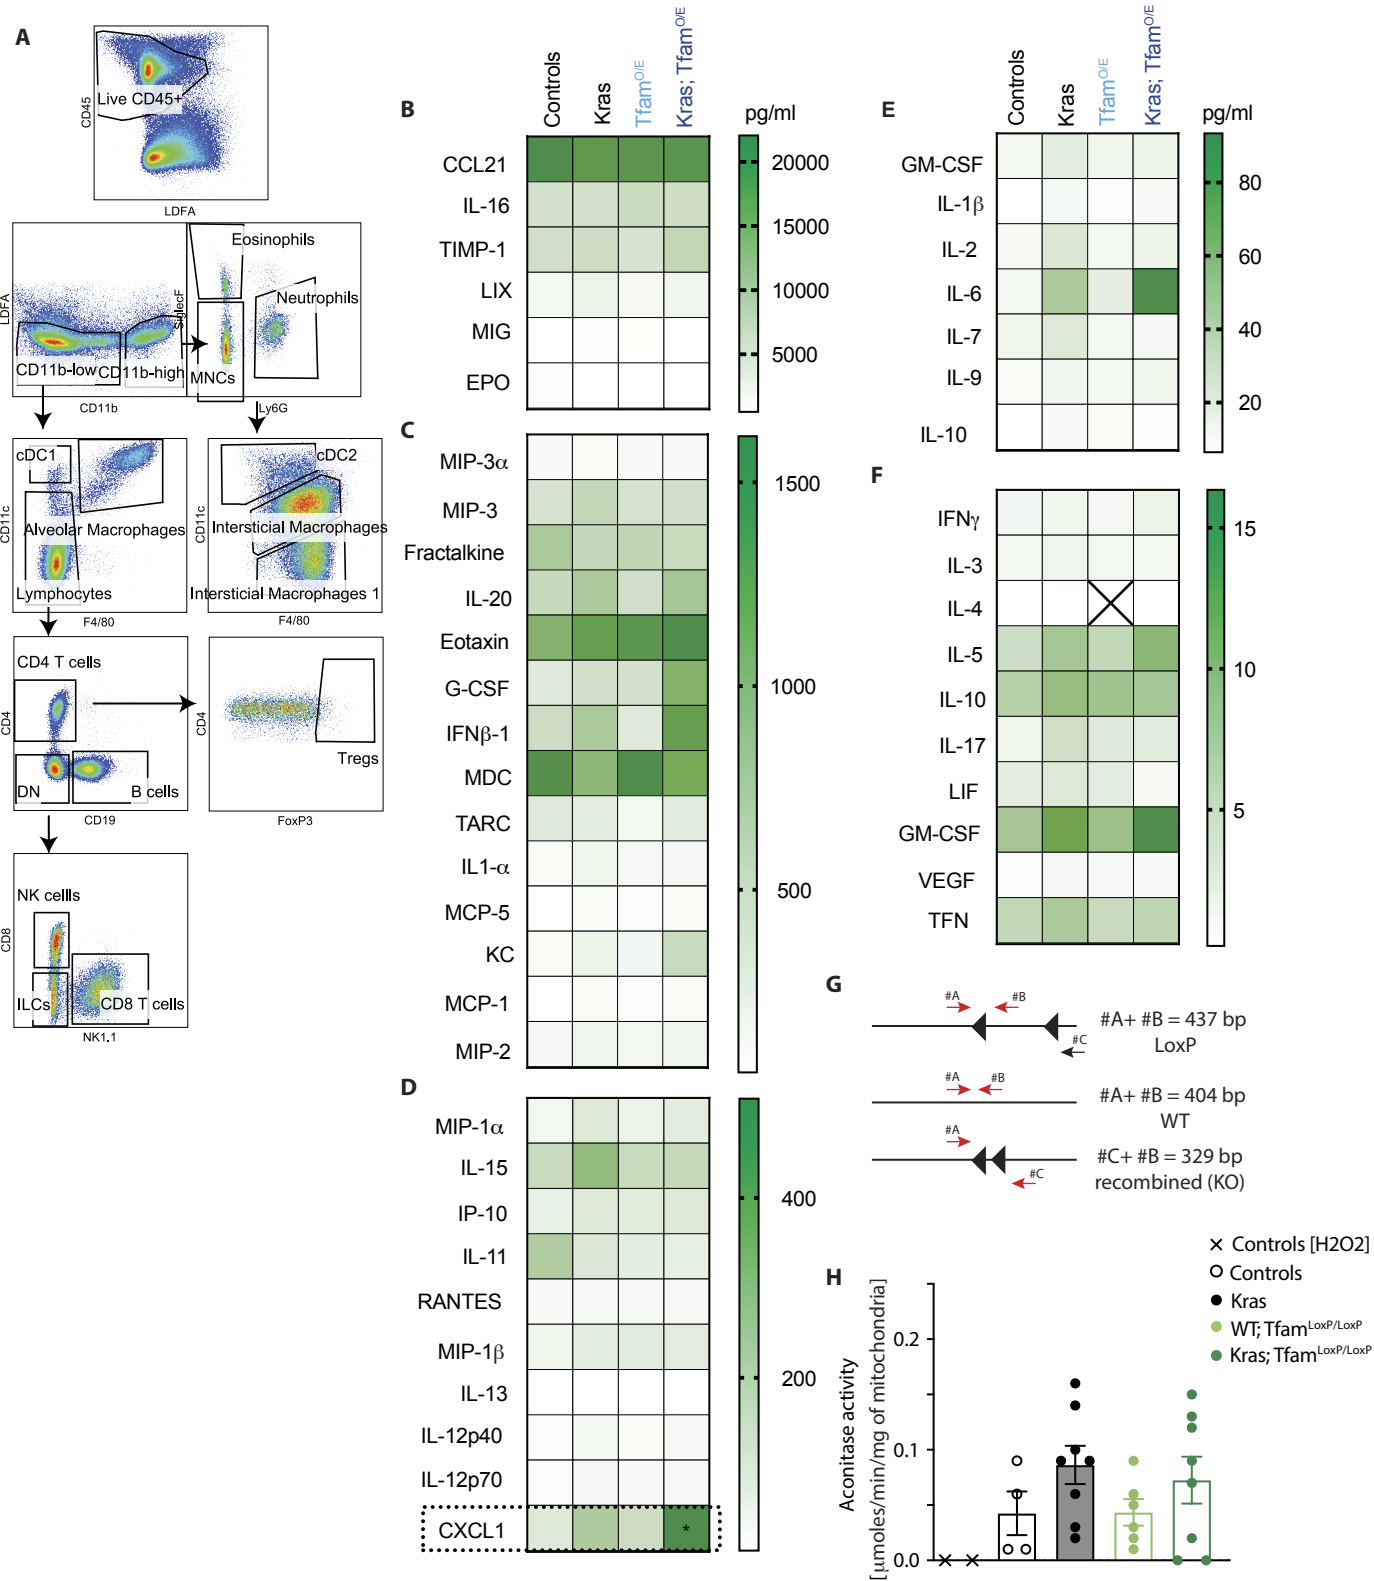

**Figure S2. Cytokine levels in plasma are mostly unaffected by the activation of KRAS<sup>G12D</sup> and by the increase in mtDNA levels.** **A.** Gating strategy used for sorting single cells suspensions generated from mouse lung. Cell markers used are reported on the axes and specific immune populations in the graphs. **B-F.** Heatmaps showing the levels (pg/ml) of 45 inflammatory cytokines and chemokines measured in plasma samples collected from control ( $N=8$ ), Kras ( $N=7$ ), Tfam<sup>OE</sup> ( $N=5$ ), Kras; Tfam<sup>OE</sup> ( $N=10$ ) mice at 16 weeks after tumor induction. Heatmaps show the mean values of biological replicates. **G.** Schematic representation of the *Tfam* locus and expected PCR product sizes of different alleles (51) upon Cre recombination. **H.** Aconitase enzymatic activity measured in mitochondria isolated from lungs of Kras and Kras; Tfam<sup>LoxP/LoxP</sup> mice. Scatter plot columns report individual data points and mean values  $\pm$ SD.

**Supplementary auxiliary files:**

**Movie S1. Micro computed tomography stack of whole lung tissue from a WT animal (WT1).**

**Movie S2. Micro computed tomography stack of whole lung tissue from a WT animal (WT2).**

**Movie S3. Micro computed tomography stack of whole lung tissue from a WT animal (WT3).**

**Movie S4. Micro computed tomography stack of whole lung tissue from a WT animal (WT4).**

**Movie S5. Micro computed tomography stack of whole lung tissue from a Kras animal (Kras1).**

**Movie S6. Micro computed tomography stack of whole lung tissue from a Kras animal (Kras2).**

**Movie S7. Micro computed tomography stack of whole lung tissue from a Kras animal (Kras3).**

**Movie S8. Micro computed tomography stack of whole lung tissue from a Kras animal (Kras4).**

**Movie S9. Micro computed tomography stack of whole lung tissue from a Kras animal (Kras5).**

**Movie S10. Micro computed tomography stack of whole lung tissue from a Kras animal (Kras6).**

**Movie S11. Micro computed tomography stack of whole lung tissue from a Kras; TfamO/E animal (Kras; Tfam<sup>O/E</sup> 1).**

**Movie S12. Micro computed tomography stack of whole lung tissue from a Kras; TfamO/E animal (Kras; Tfam<sup>O/E</sup> 2).**

**Movie S13. Micro computed tomography stack of whole lung tissue from a Kras; TfamO/E animal (Kras; Tfam<sup>O/E</sup> 3).**

**Movie S14. Micro computed tomography stack of whole lung tissue from a Kras; TfamO/E animal (Kras; Tfam<sup>O/E</sup> 4).**

**Movie S15. Micro computed tomography stack of whole lung tissue from a Kras; TfamO/E animal (Kras; Tfam<sup>O/E</sup> 5).**

**Movie S16. Micro computed tomography stack of whole lung tissue from a Kras; TfamO/E animal (Kras; Tfam<sup>O/E</sup> 6).**

**Movie S17. Micro computed tomography stack of whole lung tissue from a TfamO/E animal (Tfam<sup>O/E</sup> 1).**

**Movie S18. Micro computed tomography stack of whole lung tissue from a TfamO/E animal (Tfam<sup>O/E</sup> 2).**

**Movie S19. Micro computed tomography stack of whole lung tissue from a TfamO/E animal (Tfam<sup>O/E</sup> 3).**

**Movie S20. Micro computed tomography stack of whole lung tissue from a TfamO/E animal (Tfam<sup>O/E</sup> 4).**
